# Supplementary material for: High plasticity of axonal pathology in Alzheimer’s disease mouse models
Source: PubMed Central journal article supplement (PMC5296955; doi:10.1186/s40478-017-0415-y), 2017-02-07
Supplement: 40478_2017_415_MOESM2_ESM.pdf [file 40478_2017_415_MOESM2_ESM.pdf]

SUPPLEMENTARY TABLE 1

## High plasticity of axonal pathology in Alzheimer's disease mouse models

Lidia Blazquez-Llorca<sup>a+,\*</sup>, Susana Valero-Freitag<sup>a+,\*</sup>, Eva Ferreira Rodrigues<sup>a</sup>, Ángel Merchán-Pérez<sup>b,c</sup>, J. Rodrigo Rodríguez<sup>b,d</sup>, Mario M. Dorostkar<sup>a</sup>, Javier DeFelipe<sup>b,d,e</sup> and Jochen Herms<sup>a,f,\*</sup>

| Images properties                                                                                                                                                    | Aim                                                                | Mouse model                        | Number of imaging positions | Number of time points / Total number of images | Number of dystrophic axons | Total number of axons | Number of A $\beta$ plaques |
|----------------------------------------------------------------------------------------------------------------------------------------------------------------------|--------------------------------------------------------------------|------------------------------------|-----------------------------|------------------------------------------------|----------------------------|-----------------------|-----------------------------|
| High magnification images (logical size 512 $\times$ 512 pixels; physical size x, y, z: 84.9 x 84.9 x 40 $\square$ 60 $\mu$ m; z-step = 1 $\mu$ m)                   | The 3D reconstruction of AxDs over time                            | dE9 (number of animals, n = 6)     | #1                          | 19 / 19                                        | 1                          | 6                     | 1                           |
|                                                                                                                                                                      |                                                                    |                                    | #2                          | 19 / 19                                        | 4                          | 11                    | 1                           |
|                                                                                                                                                                      |                                                                    |                                    | #3                          | 19 / 19                                        | 1                          | 5                     | 1                           |
|                                                                                                                                                                      |                                                                    |                                    | #4                          | 19 / 19                                        | 1                          | 8                     | 1                           |
|                                                                                                                                                                      |                                                                    |                                    | #5                          | 18 / 18                                        | 2                          | 10                    | 1                           |
|                                                                                                                                                                      |                                                                    |                                    | #6                          | 18 / 18                                        | 1                          | 6                     | 1                           |
|                                                                                                                                                                      |                                                                    |                                    | <b>TOTAL</b>                | <b>18 - 19 / 112</b>                           | <b>10</b>                  | <b>46</b>             | <b>6</b>                    |
|                                                                                                                                                                      |                                                                    | APP-PS1 (number of animals, n = 7) | #1                          | 17 / 17                                        | 3                          | 9                     | 1                           |
|                                                                                                                                                                      |                                                                    |                                    | #2                          | 23 / 23                                        | 5                          | 14                    | 1                           |
|                                                                                                                                                                      |                                                                    |                                    | #3                          | 23 / 23                                        | 3                          | 9                     | 1                           |
|                                                                                                                                                                      |                                                                    |                                    | #4                          | 23 / 23                                        | 3                          | 11                    | 1                           |
|                                                                                                                                                                      |                                                                    |                                    | #5                          | 19 / 19                                        | 1                          | 8                     | 1                           |
|                                                                                                                                                                      |                                                                    |                                    | #6                          | 19 / 19                                        | 1                          | 7                     | 1                           |
|                                                                                                                                                                      |                                                                    |                                    | <b>TOTAL</b>                | <b>17 - 23 / 124</b>                           | <b>16</b>                  | <b>58</b>             | <b>6</b>                    |
| Panoramic high-resolution images (logical size 1400 $\times$ 1400 pixels; physical size x, y, z: 202.3 x 202.3 x 39.9 $\square$ 50.1 $\mu$ m; z-step = 0.3 $\mu$ m)* | The spatiotemporal relationship between A $\beta$ plaques and AxDs | APP-PS1 (number of animals, n = 7) | #1                          | 23 / 23                                        | 14                         | -                     | 6                           |
|                                                                                                                                                                      |                                                                    |                                    | #2                          | 23 / 23                                        | 6                          | -                     | 4                           |
|                                                                                                                                                                      |                                                                    |                                    | #3                          | 23 / 23                                        | 3                          | -                     | 2                           |
|                                                                                                                                                                      |                                                                    |                                    | #4                          | 23 / 23                                        | 9                          | -                     | 7                           |
|                                                                                                                                                                      |                                                                    |                                    | #5                          | 23 / 23                                        | 11                         | -                     | 6                           |
|                                                                                                                                                                      |                                                                    |                                    | #6                          | 21 / 21                                        | 4                          | -                     | 4                           |
|                                                                                                                                                                      |                                                                    |                                    | #7                          | 17 / 17                                        | 5                          | -                     | 4                           |
|                                                                                                                                                                      |                                                                    |                                    | <b>TOTAL</b>                | <b>17 - 23 / 153</b>                           | <b>52</b>                  | <b>-</b>              | <b>33</b>                   |

**Supplementary Table 1** Table showing the number of imaging positions that was successfully weekly imaged during near 6 months. For each imaging position is also shown: the number of images acquired over time (time points), and the number of dystrophic axons, axons and A $\beta$  plaques present in each imaging position.

Two types of images were acquired to carry out the aims of the work.

\*Note that data from panoramic high-resolution images (lifetime of AxDs and type of axon where AxDs are formed) were also used in Aim "The 3D reconstruction of AxDs over time".
