# Supplementary material for: High plasticity of axonal pathology in Alzheimer’s disease mouse models
Source: PubMed Central journal article supplement (PMC5296955; doi:10.1186/s40478-017-0415-y), 2017-02-07
Supplement: 40478_2017_415_MOESM3_ESM.pdf [file 40478_2017_415_MOESM3_ESM.pdf]

SUPPLEMENTARY FIGURE 2

## High plasticity of axonal pathology in Alzheimer's disease mouse models

Lidia Blazquez-Llorca<sup>a+,\*</sup>, Susana Valero-Freitag<sup>a+,\*</sup>, Eva Ferreira Rodrigues<sup>a</sup>, Ángel Merchán-Pérez<sup>b,c</sup>, J. Rodrigo Rodríguez<sup>b,d</sup>, Mario M. Dorostkar<sup>a</sup>, Javier DeFelipe<sup>b,d,e</sup> and Jochen Herms<sup>a,f,\*</sup>

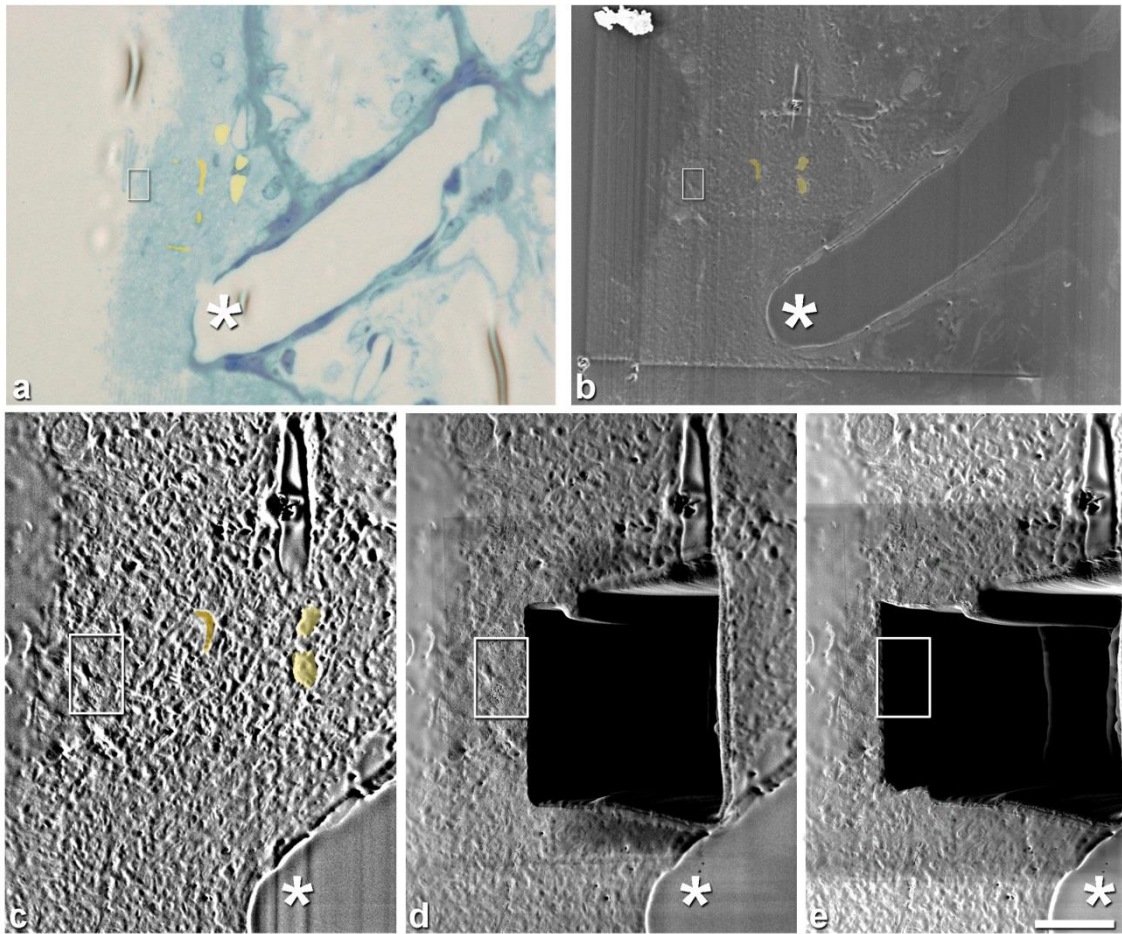

**Supplementary Fig. 2 Correlative light and FIB/SEM microscopy.** (a), Photograph of the final Toluidine blue stained semithin section that was taken from the surface of the block containing the region of interest shown in Fig. 6 and that was further analyzed using FIB/SEM microscopy. NIRB marks are visible (pseudocolored in yellow and orange; see Fig. 6 c). (b), Same field of view as in a showing the correlative laser marks on the surface of the block used for FIB/SEM (pseudocolored in yellow and orange). (c–d), Higher SEM image magnification of the region of interest (rectangle), before (c) and after (d) milling of the trench needed to obtain back-scattered electron images. d shows the beginning of acquisition of the stack of electron microscopy images and e shows the trench after the region of interest has been fully reconstructed. The rectangle in all images shows the position and the x, z dimensions of the FIB/SEM stack that was obtained. The asterisk points out the same blood vessel. Scale bar (in e): 44.5  $\mu\text{m}$  in a, b; 15  $\mu\text{m}$  in c–e
