# Supplementary material for: High plasticity of axonal pathology in Alzheimer’s disease mouse models
Source: PubMed Central journal article supplement (PMC5296955; doi:10.1186/s40478-017-0415-y), 2017-02-07
Supplement: 40478_2017_415_MOESM5_ESM.pdf [file 40478_2017_415_MOESM5_ESM.pdf]

SUPPLEMENTARY FIGURE 4

## High plasticity of axonal pathology in Alzheimer's disease mouse models

Lidia Blazquez-Llorca<sup>a+,\*</sup>, Susana Valero-Freitag<sup>a+,\*</sup>, Eva Ferreira Rodrigues<sup>a</sup>, Ángel Merchán-Pérez<sup>b,c</sup>, J. Rodrigo Rodríguez<sup>b,d</sup>, Mario M. Dorostkar<sup>a</sup>, Javier DeFelipe<sup>b,d,e</sup> and Jochen Herms<sup>a,f,\*</sup>

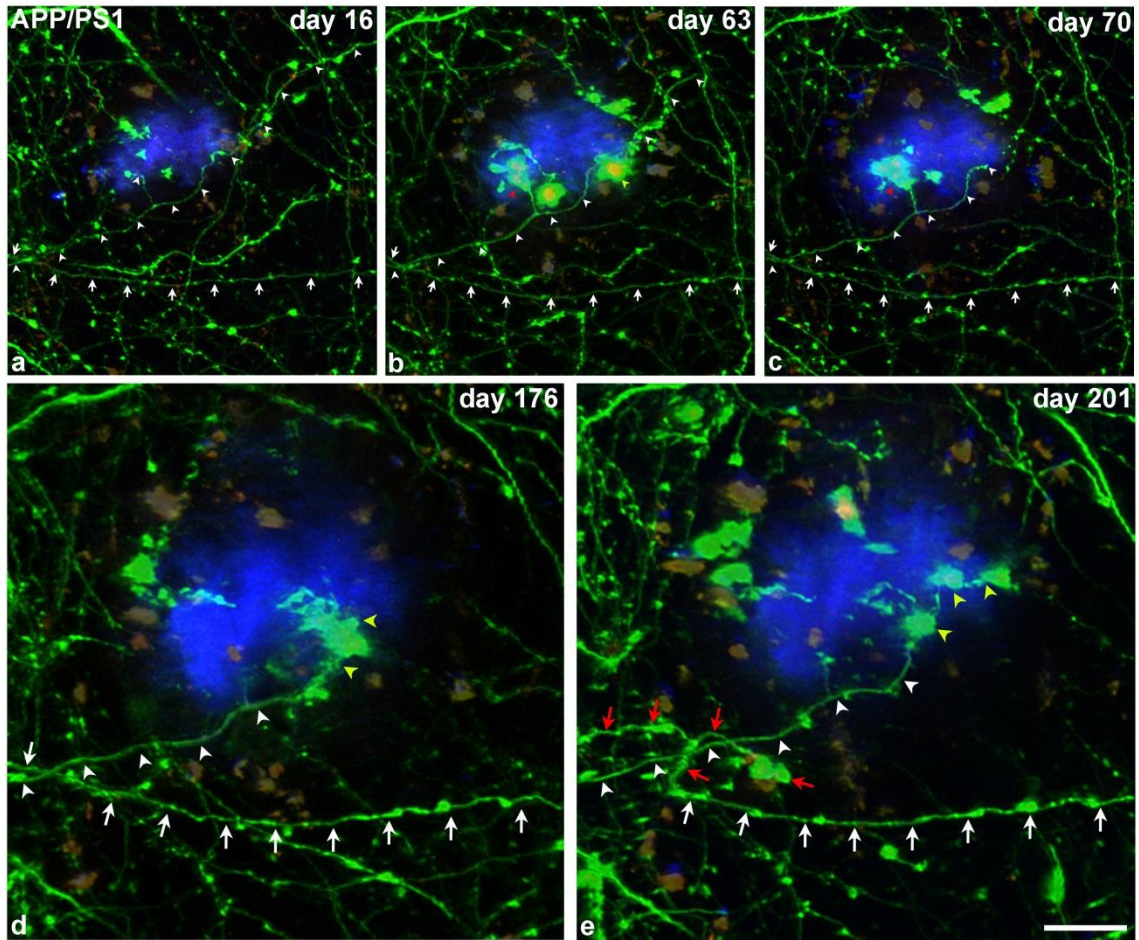

**Supplementary Fig. 4 Re-formation of AxDs and sprouting phenomenon (re-growth) in the APP-PS1 mouse.** (a–e), Maximum projection of a stack of images (40 images; z-step: 1  $\mu\text{m}$ ) taken with the two-photon microscope in the supragranular layers of the somatosensory cortex of the APP-PS1 mouse at five different time points showing some neurites expressing GFP around an  $\text{A}\beta$  plaque stained with Methoxy-X04 (blue). There are two axons of interest, one is marked with arrowheads (axon 1) and the other with arrows (axon 2). Axon 1: At the beginning, axon 1 looks normal (a). Days later, the middle part of the axon becomes dystrophic (yellow arrowhead – dys 2a), as does a short branch (red arrowhead – dys 1). Moreover, a distal portion of axon 1 disappears and so the axon as a whole is shortened (b). One week later, the AxD in the middle part has disappeared and axon 1 is cut at this point (c). Days later, the AxD at the short branch (dys 1) has disappeared and another AxD (dys 2b) appears at the edge of axon 1 where dys 2a was previously present (d). The morphology of this AxD changes over time (e). Axon 2: At the beginning, axon 2 looks normal (a–b). Days later, this axon gets thicker (c–d) and, at some point, the axon is cut and then re-grows through the  $\text{A}\beta$  plaque. The new re-growth segment (32  $\mu\text{m}$ ) becomes dystrophic (e, red arrows). Scale bar (in e): 19.5  $\mu\text{m}$  in a–c; 10.3  $\mu\text{m}$  in d–e
