# Supplementary material for: High plasticity of axonal pathology in Alzheimer’s disease mouse models
Source: PubMed Central journal article supplement (PMC5296955; doi:10.1186/s40478-017-0415-y), 2017-02-07
Supplement: 40478_2017_415_MOESM6_ESM.pdf [file 40478_2017_415_MOESM6_ESM.pdf]

SUPPLEMENTARY FIGURE 5

## High plasticity of axonal pathology in Alzheimer's disease mouse models

Lidia Blazquez-Llorca<sup>a+,\*</sup>, Susana Valero-Freitag<sup>a+,\*</sup>, Eva Ferreira Rodrigues<sup>a</sup>, Ángel Merchán-Pérez<sup>b,c</sup>, J. Rodrigo Rodríguez<sup>b,d</sup>, Mario M. Dorostkar<sup>a</sup>, Javier DeFelipe<sup>b,d,e</sup> and Jochen Herms<sup>a,f,\*</sup>

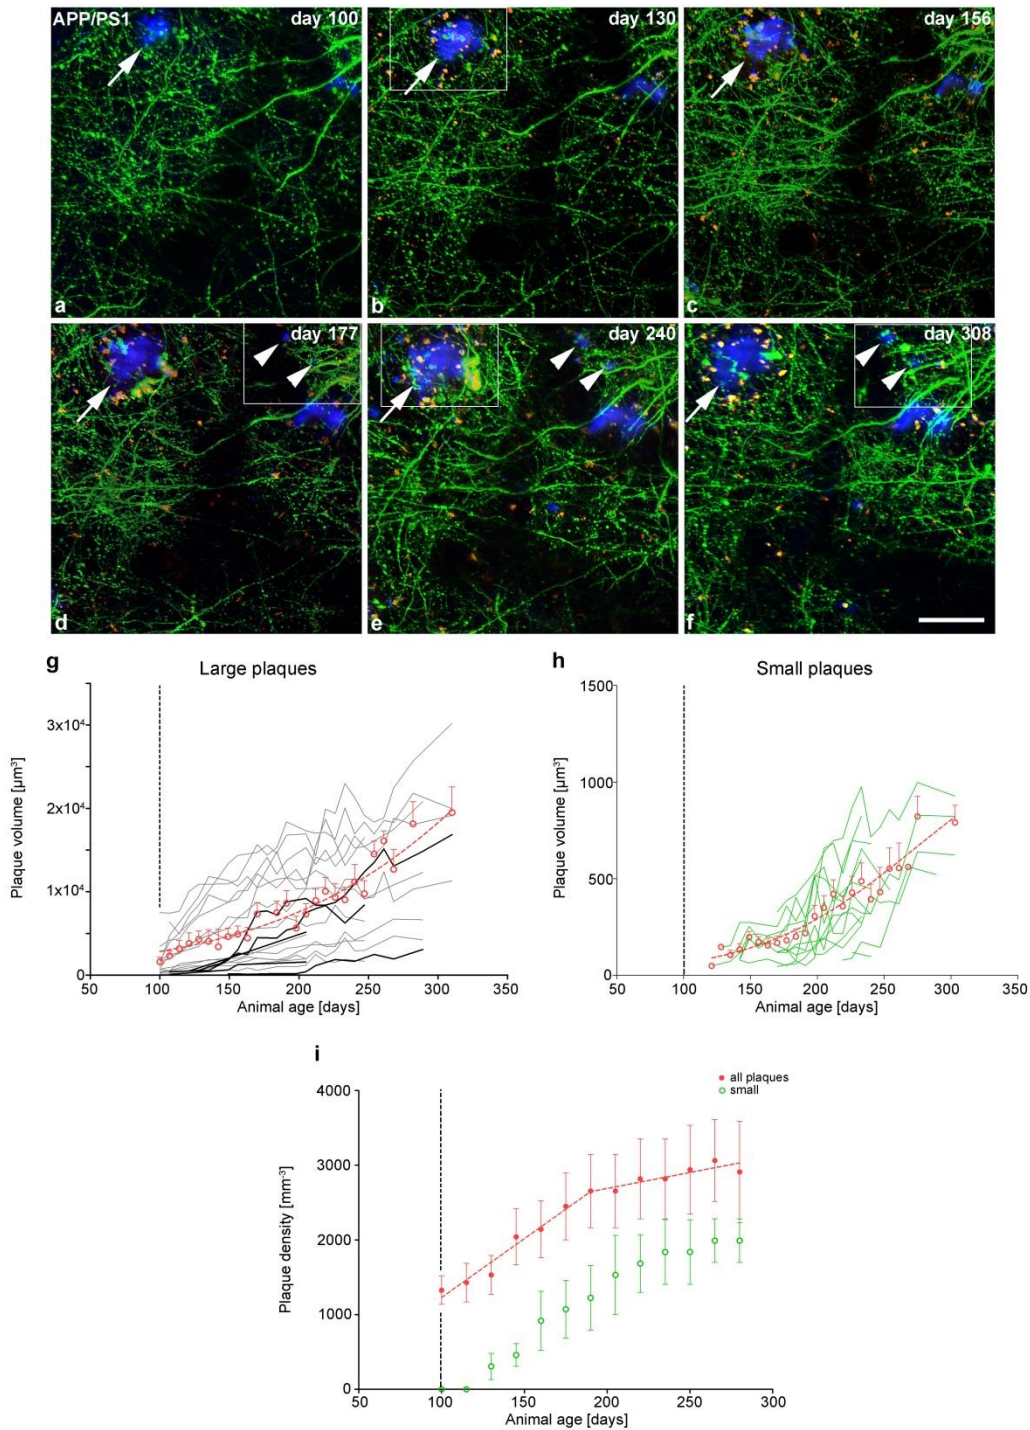

**Supplementary Fig. 5 Relationship between A $\beta$  plaques and AxDs formation and development. Quantitative analysis of different types of A $\beta$  plaques.** (a-f), Maximum projection of images (136 images,  $z = 0.3 \mu\text{m}$ ) showing GFP-expressing neurites and the formation and growth of different types of A $\beta$  plaques over time in the supragranular layers of the somatosensory cortex of the APP-PS1 mouse (two-photon microscopy). An A $\beta$  plaque that reaches a large volume is pointed out by an arrow. Arrowheads point out small plaques. Rectangles in **b**, **e** surround the region shown in Fig. 8 a, b, respectively. Rectangles in **d**, **f** surround the region shown in Fig. 8 c, d, respectively. Note that most AxDs were formed and developed during the imaging period, and numerous AxDs had already disappeared by the end of this time (see A $\beta$  plaque pointed out by an arrow). (**g**, **h**), Graphs showing the volume of large A $\beta$  plaques (both pre-existing plaques, gray lines; and plaques that appeared during the imaging period, black lines) (**g**) and small A $\beta$  plaques (**h**) in the animal lifetime. Open red circles show the mean  $\pm$  SEM volume over time for large (**g**) and small (**h**) A $\beta$  plaques. Dashed red line shows the fitted sigmoid curve for large ( $R^2$  0.36) and small A $\beta$  plaques ( $R^2$  0.45); the inflection point of the function is expected at day 408 in **g** and at day 271 in **h**. (**i**), Graph showing the density of A $\beta$  plaques in the animal age (mean  $\pm$  SEM) (red circles). Dashed red lines correspond to the two fitted regression lines ( $R^2$  0.28); both lines intercept at day 190. The slope is  $15.75 \pm 6.34 \mu\text{m}^3/\text{day}$  for the first line and  $4.28 \pm 5.45 \mu\text{m}^3/\text{day}$  for the second line. The density of small A $\beta$  plaques against animal age (mean  $\pm$  SEM) (green open circles) has been also represented. Scale bar (in **f**):  $42.7 \mu\text{m}$  in **a-f**
